# Supplementary material for: Microcavities on PDMS microchannel replicated from sandpaper templates trap cells to enhance cell adhesion and proliferation
Source: Royal Society of Chemistry journal article supplement (doi:10.1039/d2nj02091b), 2022-01-01
Supplement: d2nj02091b1.pdf [file d2nj02091b1.pdf]

## Supplementary Information

### Micro-cavities on PDMS microchannel replicated from sandpaper templates trap cells to enhance cell adhesion and proliferation

Received 00th January 20xx,  
Accepted 00th January 20xx

Feng Chen<sup>a</sup>, Shiming Wu<sup>a</sup>, Jingjing Fu<sup>b</sup>, Xiao Hui Lv<sup>a</sup>, Hui Hui Chai<sup>a</sup>, Li Xia Gao<sup>c</sup>, and Ling Yu<sup>a\*</sup>

DOI: 10.1039/x0xx00000x

#### Supplementary information

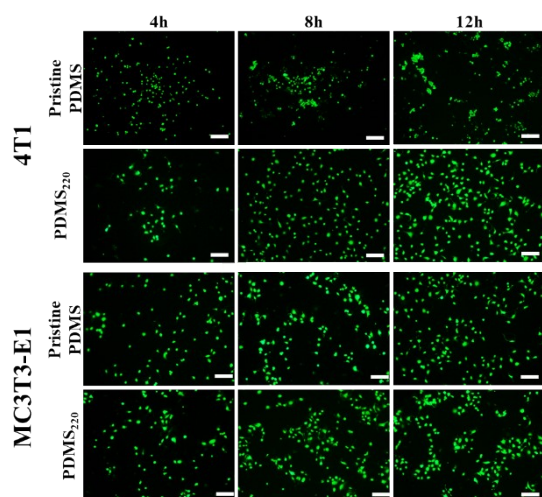

**s. Figure 1** Adhesion of 4T1, MC3T3-E1 cells on pristine PDMS and PDMS<sub>220</sub>.  $1 \times 10^4$  cells were cultured on various PDMS substrates for different times, microscope images of the adherent cells stained by Calcein-AM (green), scale bar: 200  $\mu$ m.

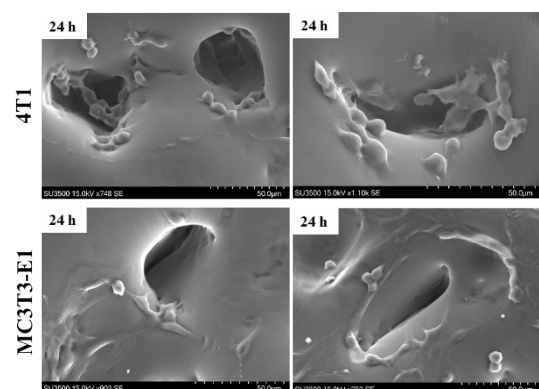

**s. Figure 2** SEM characterized cells grown on PDMS<sub>220</sub>. 4T1, MC3T3-E1 cells were cultured on PDMS<sub>220</sub> for 24 h. The samples were treated by 4% paraformaldehyde and dehydrated in ethanol.

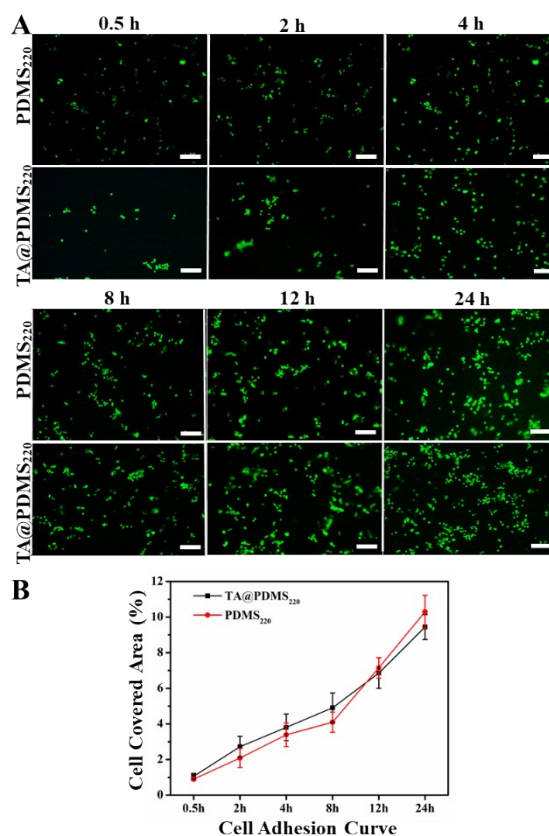

**s. Figure 3** Adhesion of HepG2 cells on PDMS<sub>220</sub> and TA@PDMS<sub>220</sub>. A)  $1 \times 10^4$  HepG2 cells were cultured on various PDMS substrates for different times, and the adherent cells were stained by Calcein-AM (green), scale bar: 200  $\mu$ m. B) Quantification of cell adhesion by the particle analysis function of ImageJ software.

<sup>a</sup> Key Laboratory of Luminescence Analysis and Molecular Sensing, Ministry of Education, School of Materials & Energy, Southwest University, Chongqing, 400715, China

<sup>b</sup> School of Preclinical Medicine, North Sichuan Medical College, Nanchong, 637000, P.R. China

<sup>c</sup> National & Local Joint Engineering Research Center of Targeted and Innovative Therapeutics, College of Pharmacy & International Academy of Targeted Therapeutics and Innovation, Chongqing University of Arts and Sciences, Chongqing 402160, P. R. China.

\*Corresponding author: lingyu12@swu.edu.cn (L. Yu)
